# Supplementary material for: Preclinical Evidence and Possible Mechanisms of Extracts or Compounds from Cistanches for Alzheimer’s Disease
Source: PubMed Central journal article supplement (PMC6764737; doi:10.14336/ad.2018.0815-1), 2019-10-01
Supplement: AD-10-5-1075-s.pdf [file AD-10-5-1075-s.pdf]

## SUPPLEMENTARY DATA

# **Preclinical Evidence and Possible Mechanisms of Extracts or Compounds from Cistanches for Alzheimer's Disease**

**Xiao-Li Zhou, Meng-Bei Xu, Ting-Yu Jin, Pei-Qing Rong, Guo-Qing Zheng\*, Yan Lin\***

Department of Neurology, the Second Affiliated Hospital and Yuying Children's Hospital of Wenzhou Medical University, Wenzhou, China

# SUPPLEMENTARY DATA

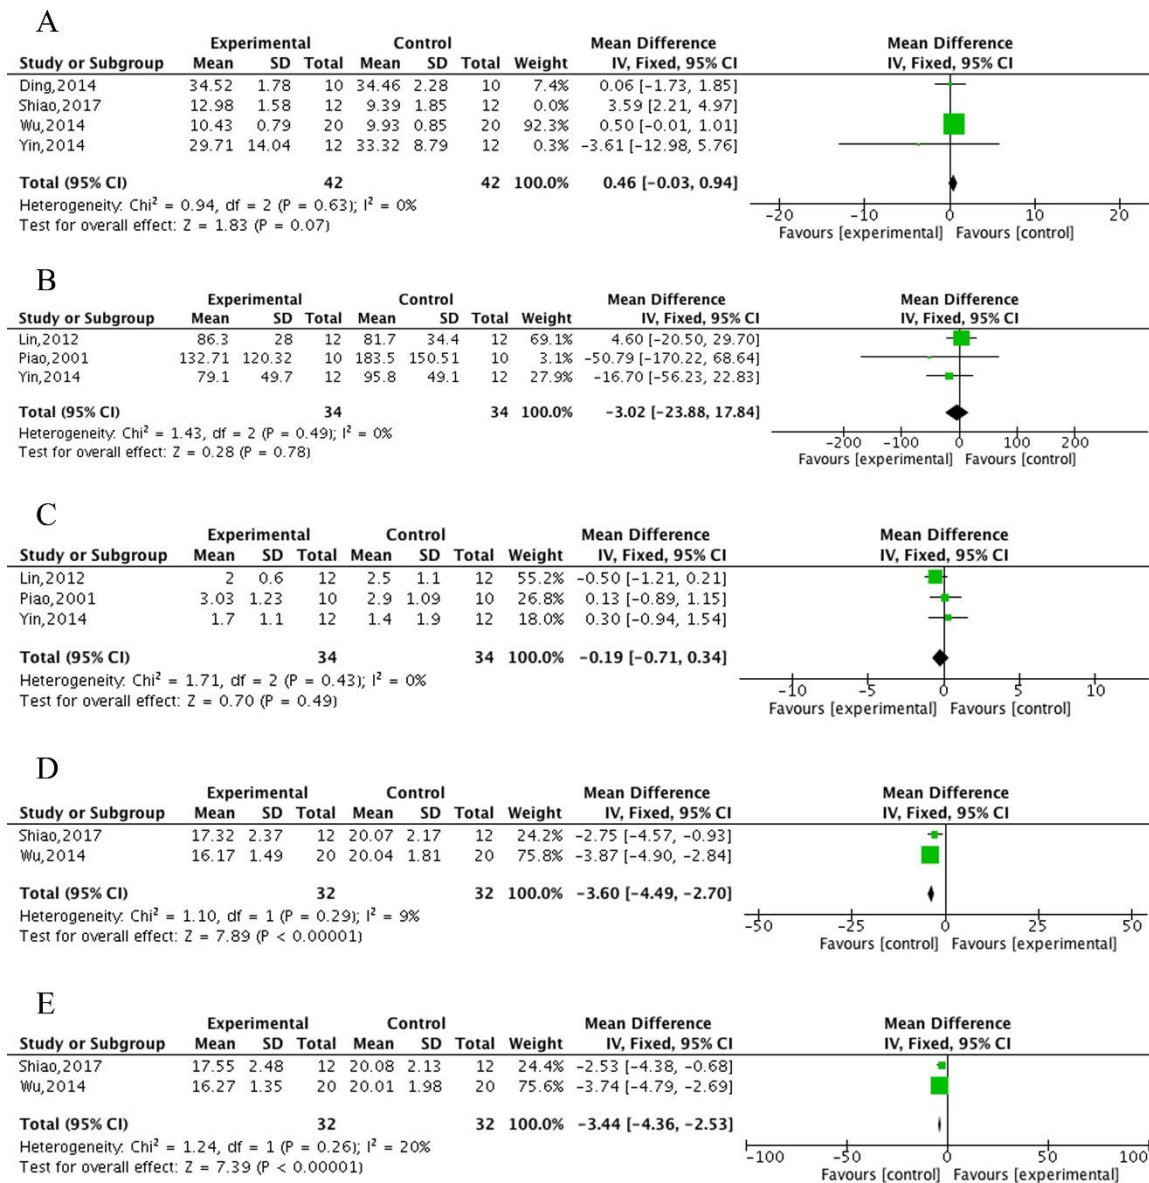

**Supplemental Figure 1. The forest plot of neurobehavioral function indices changes.** Effect of ECC for (A) increasing exact time in platform-quadrant in Morris water maze test, decreasing (B) react latency and (C) error times in retention test in Step-down test, increasing the (D) frequency and (E) time spending in Open field test compared with WCM controls.

# SUPPLEMENTARY DATA

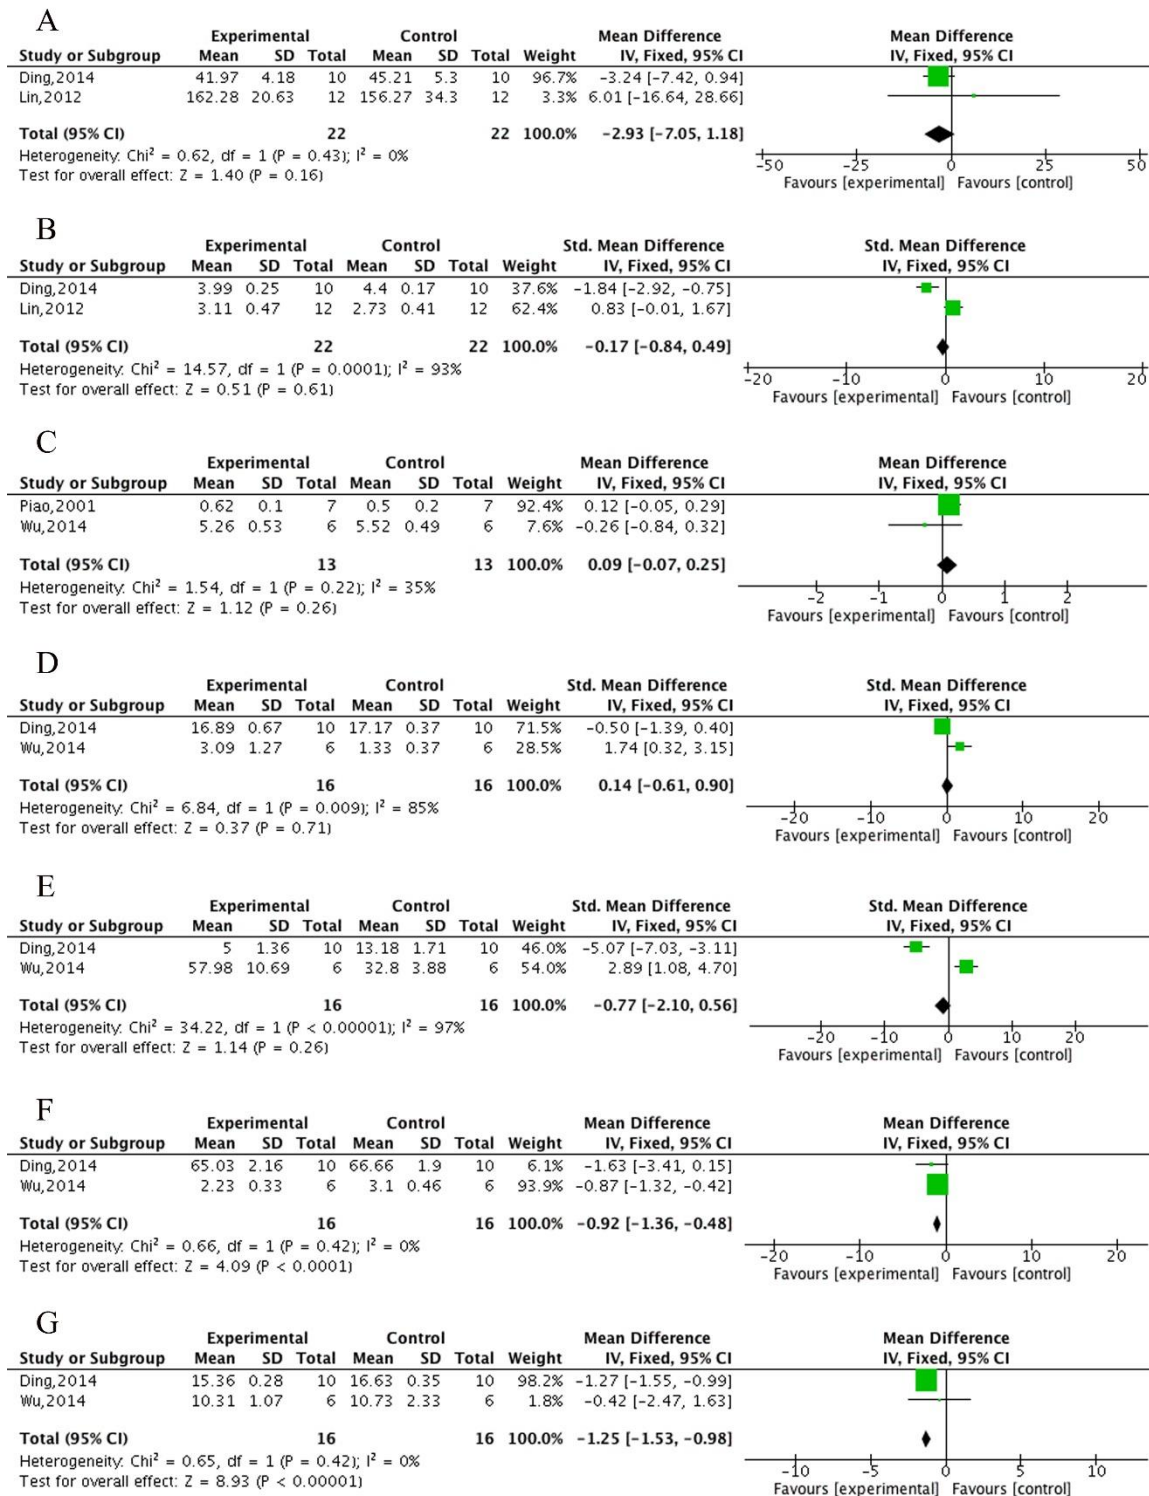

**Supplemental Figure 2. The forest plot of neurobiochemical changes.** Effect of ECC for increasing the activity of (A) SOD, (B) MDA and (C) AChE, increasing the level of DA and NE in hippocampus (D and E) and in cortex (F and G) compared with WCM controls.
